# Supplementary material for: Impact of SO 2 injection profiles on simulated volcanic forcing for the 2009 Sarychev eruptions – investigating the importance of using high-vertical-resolution methods when compiling SO 2 data
Source: Copernicus journal article supplement (doi:10.5194/acp-25-2047-2025), 2025-02-17
Supplement: Supplementary file 1 [file acp-25-2047-2025-supplement.pdf]

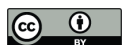

*Supplement of*

**Impact of SO<sub>2</sub> injection profiles on simulated volcanic forcing for the 2009 Sarychev eruptions – investigating the importance of using high-vertical-resolution methods when compiling SO<sub>2</sub> data**

**Emma Axebrink et al.**

*Correspondence to:* Johan Friberg ([johan.friberg@fysik.lu.se](mailto:johan.friberg@fysik.lu.se))

The copyright of individual parts of the supplement might differ from the article licence.

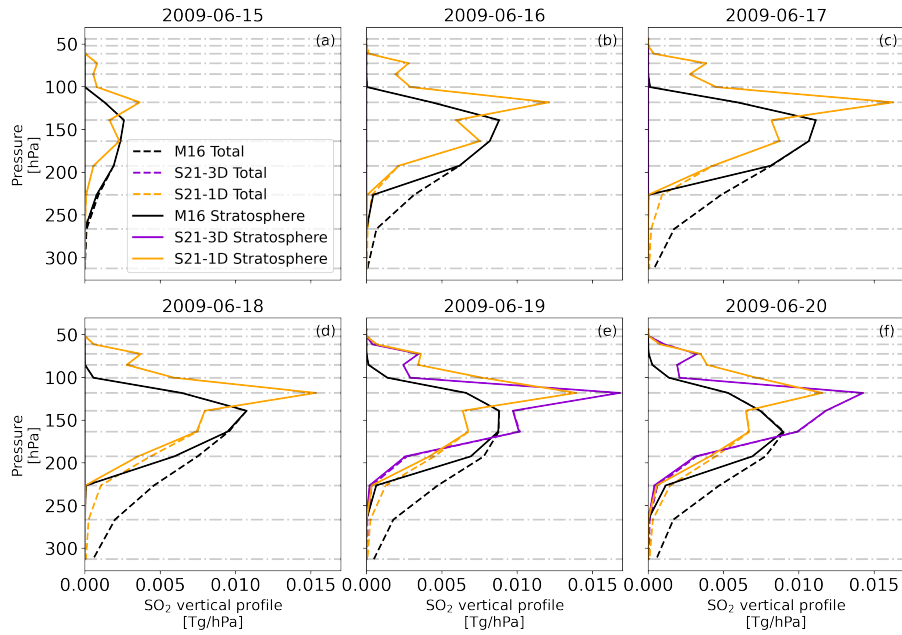

**Figure S1.** Vertical profile for for the global total volcanic  $\text{SO}_2$  during the first 6 days after the eruption. The dashed lines represent the total amount of volcanic  $\text{SO}_2$  in the atmosphere whereas the solid lines represent the total amount of volcanic  $\text{SO}_2$  in the stratosphere. The gray dashed-dotted lines represent the model pressure levels. To isolate the volcanic  $\text{SO}_2$  we have subtracted the  $\text{SO}_2$  levels in the No-Volc simulation from the other 3 simulations.

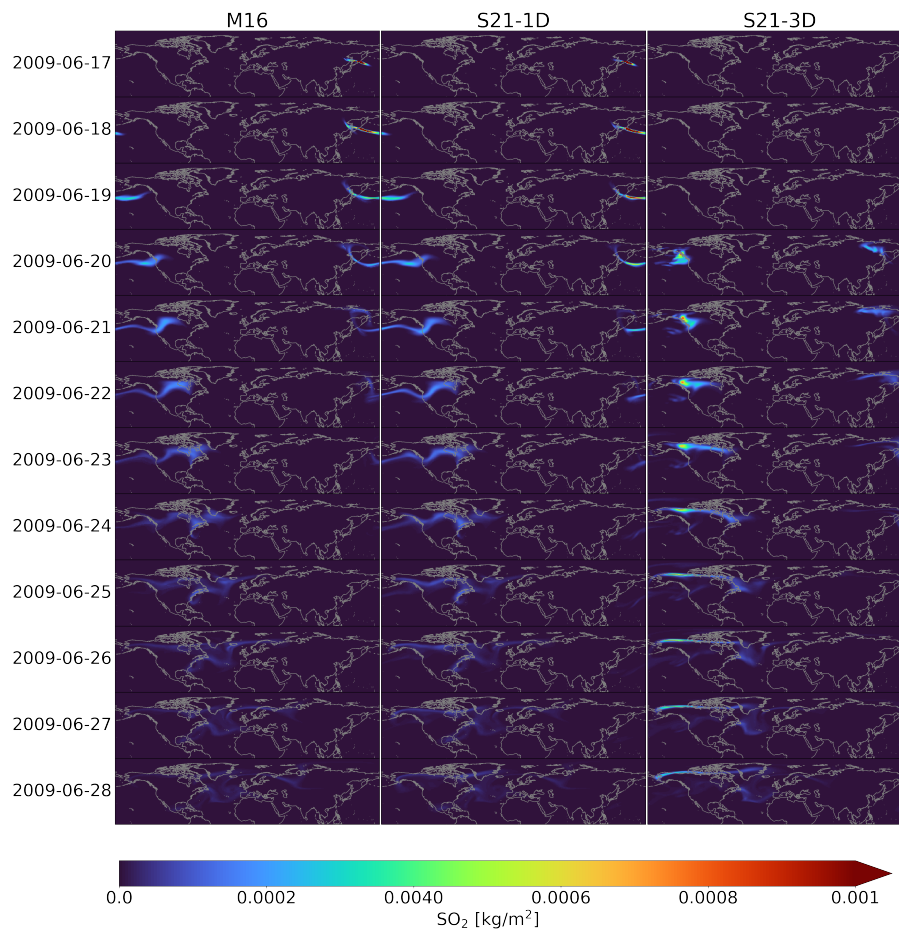

**Figure S2.** Daily averaged SO<sub>2</sub> column values for the M16, S21-3D and S21-1D simulations. Displayed are the values from the 12 days following the Sarychev 2009 eruption for the northern hemisphere. To isolate the volcanic SO<sub>2</sub> we have subtracted the SO<sub>2</sub> levels in the No-Volc simulation from the other 3 simulations.
